# Supplementary material
Source: ML conference proceedings conference paper supplement (https://proceedings.neurips.cc/paper_files/paper/2012/hash/4c27cea8526af8cfee3be5e183ac9605-Abstract.html)
Supplement: Supplementary file [file 4c27cea8526af8cfee3be5e183ac9605-Supplemental.zip]

---

# Supplementary Material: Efficient Sampling for Bipartite Matching Problems

---

## 1 Proof of Proposition 1

**Proposition 1.** *For any reference permutation  $\sigma$  and any choice of matching probabilities that satisfy  $\sum_{v_j \in V \setminus \pi_{1:t-1}} p(v_j | u_{\sigma(t)}, \pi_{1:t-1}) = 1$ , the distribution given by:  $Q(\pi | \sigma) = \prod_{t=1}^N p(v_{\pi(\sigma(t))} | u_{\sigma(t)}, \pi_{1:t-1})$  is a valid probability distribution over assignments.*

*Proof.* We prove this by induction, the proposition holds for  $N = 2$  ( $N = 1$  case is trivial) since:

$$\sum_{\pi} Q(\pi | \sigma) = p(v_1 | u_{\sigma(1)}, \pi_{1:0}) \times 1 + p(v_2 | u_{\sigma(1)}, \pi_{1:0}) \times 1 = 1 \quad (1)$$

Now assuming that the proposition holds for some  $N \geq 1$  we need to show that it holds for  $N + 1$ . Considering  $N + 1$  possible matches for  $u_{\sigma(1)}$  the summation can be factorized as:

$$\sum_{\pi} Q(\pi | \sigma) = \sum_{i=1}^{N+1} p(v_i | u_{\sigma(1)}, \pi_{1:0}) \left[ \sum_{\pi' \in \Omega_i} \prod_{t=2}^{N+1} p(v_{\pi'(\sigma(t))} | u_{\sigma(t)}, \pi'_{1:t-1}) \right] \quad (2)$$

where  $\Omega_i$  is the set of permutations where  $u_{\sigma(1)}$  is matched with  $v_i$  and  $\prod_{t=2}^{N+1} p(v_{\pi'(\sigma(t))} | u_{\sigma(t)}, \pi'_{1:t-1})$  is the probability of  $\pi' \in \Omega_i$ . Note that  $\Omega_i$  has  $N!$  assignments of  $N$  items and all the assignment probabilities satisfy the Theorem's conditions, therefore from our assumption we have that:

$$\sum_{\pi' \in \Omega_i} \prod_{t=2}^{N+1} p(v_{\pi'(\sigma(t))} | u_{\sigma(t)}, \pi'_{1:t-1}) = 1, \quad \forall i \quad (3)$$

and it follows that:

$$\sum_{\pi} Q(\pi | \sigma) = \sum_{i=1}^{N+1} p(v_i | u_{\sigma(1)}, \pi_{1:0}) = 1 \quad (4)$$

□

## 2 Learning To Rank

The trace plots for the four methods for one query with  $N = 25$  (plots for other queries and  $N$  look similar) are shown in Figure 1. The plots do not show any trending patterns, indicating that the chains are mixing. Figure 2 shows the average Hellinger distances versus the number of samples for each of the four methods with  $N = 25$ . From the figures it is seen that SM consistently improves the approximation of  $P$  as more samples are generated whereas the other samplers are unable to make significant progress throughout the sampling.

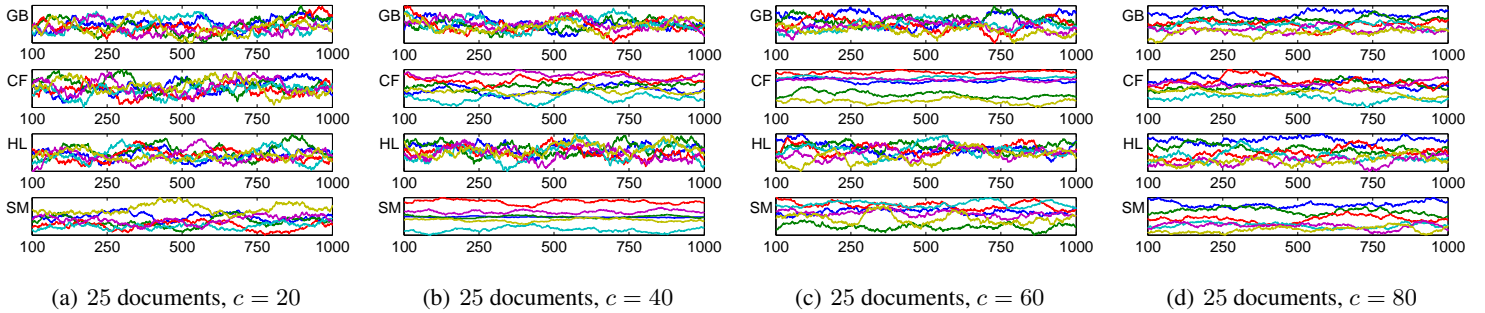

Figure 1: Learning to Rank: moving average (lag 100) trace plots for 5 randomly selected documents from  $N = 25$ .

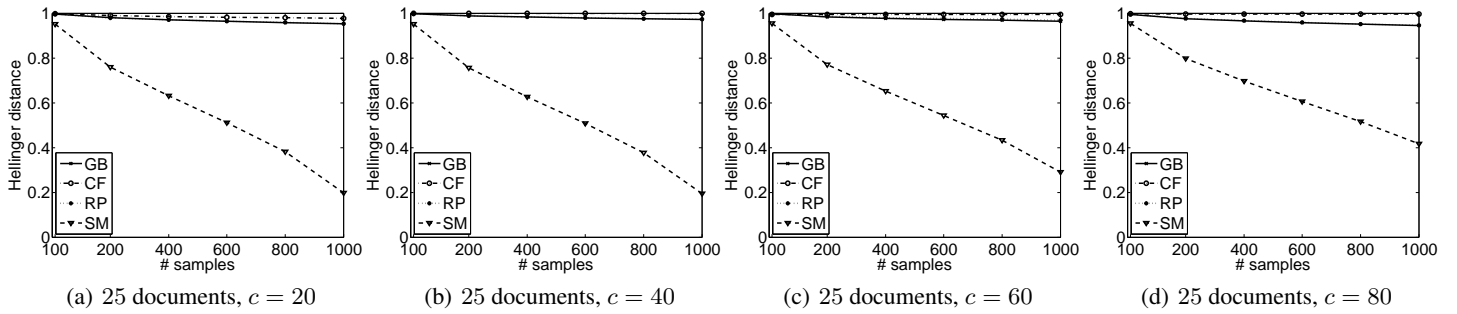

Figure 2: Learning to Rank: average Hellinger distances versus the number of samples for  $N = 25$ .

### 3 Image Matching

The trace plots for the four methods for one image pair with  $N = 25$  (plots for other image pairs and  $N$  look similar) are shown in Figure 3. Similarly to learning to rank, the plots do not show any trending patterns, indicating that the chains are mixing. Figure 4 also shows the average Hellinger distances versus the number of samples for each of the four methods with  $N = 25$ . From the figures it is seen that for sharper distributions with several well defined modes ( $c \geq 0.6$ ) SM is able to consistently improve the approximation as more samples are generated whereas the other samplers are again unable to make significant progress.

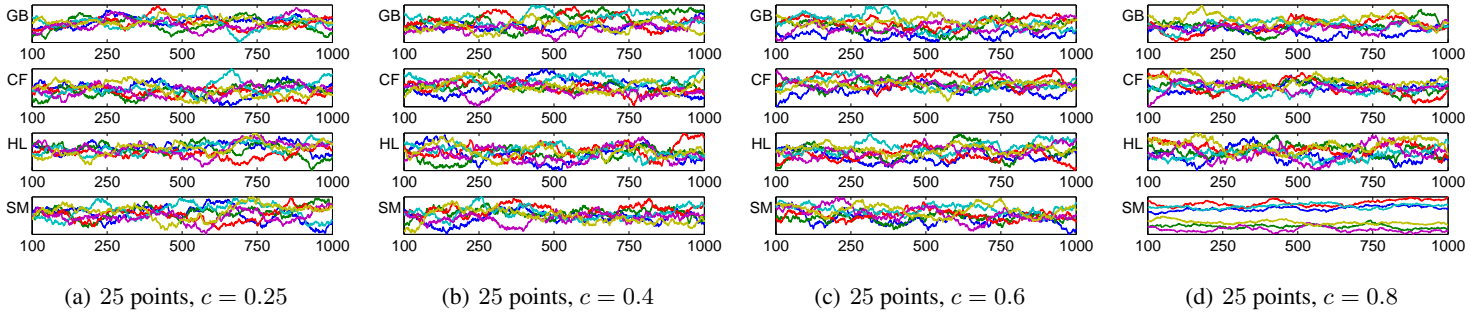

Figure 3: Image Matching: moving average (lag 100) trace plots for 5 randomly selected points from  $N = 25$ .

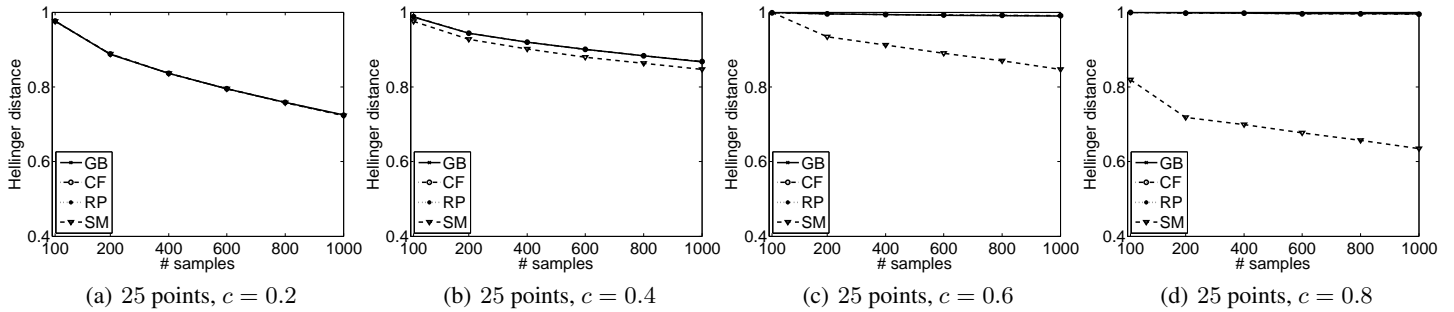

Figure 4: Image Matching: average Hellinger distances versus the number of samples for  $N = 25$ .
